# Supplementary material
Source: PubMed Central journal article supplement (PMC7855290)

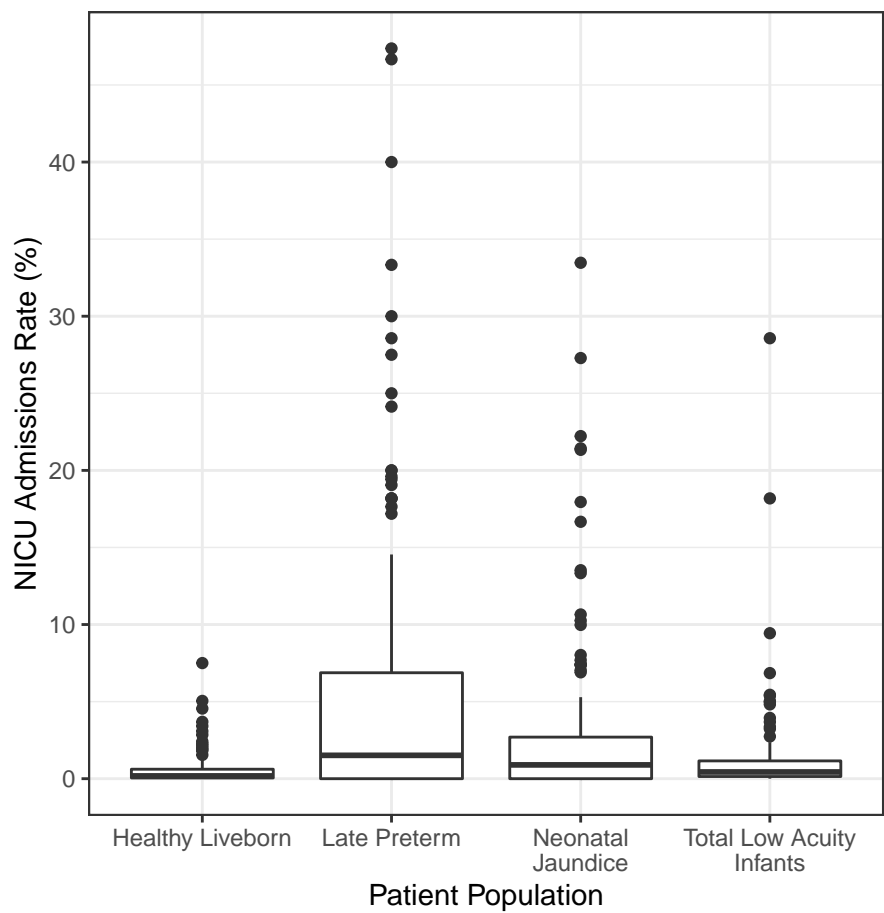

Supplement: NIHMS1609839-supplement-3.pdf [file NIHMS1609839-supplement-3.pdf]
